# Supplementary material for: Global Analysis of Gene Expression in the Developing Brain of Gtf2ird1 Knockout Mice
Source: PLOS journal article supplement (doi:10.1371/journal.pone.0023868), 2011-08-31
Supplement: S1 (10.1371/journal.pone.0023868.s001) [file journal.pone.0023868.s001]

| Gene | Description | Probe Set ID | Fold Change | q-value (%) | Accession number | Chr. |
| --- | --- | --- | --- | --- | --- | --- |
| 1700029I01Rik |  | 1424784_at | 1.305 | 7.326 | NM_001083918 | 4E1 |
| 2010315B03Rik |  | 1438238_at | 0.741 | 3.641 | XM_001472446 | 9 |
| 2210418O10Rik |  | 1449910_at | 0.741 | 7.326 | NM_029813 | 2H4 |
| 2410129H14Rik |  | 1434664_at | 0.697 | 2.043 | NM_175245 | 14E2.2 |
| 2510017J16Rik |  | 1430393_at | 0.751 | 3.641 |  | 5A1 |
| 2610005L07Rik |  | 1437717_x_at | 0.762 | 0.000 | XM_001481304 | 8A1.3 |
| 2610005L07Rik |  | 1453589_a_at | 0.774 | 8.343 | XM_001481304 | 8A1.3 |
| 2810043O03Rik |  | 1430195_at | 0.753 | 8.343 |  | 9D |
| 4833441D16Rik | RIKEN cDNA 4833441D16 | 1456706_at | 0.585 | 0.000 |  | 5A1 |
| A930011O12Rik |  | 1435453_at | 1.303 | 0.000 |  | 14D1 |
| AI506816 |  | 1439483_at | 3.378 | 0.000 | NR_015554 | 5A3 |
| AK018172 |  | 1432198_at | 0.457 | 0.000 |  | 19B |
| Akap9 | A kinase (PRKA) anchor protein (yotiao) 9 | 1455151_at | 0.699 | 0.000 | NM_194462 | 5A1 |
| Arrdc3 | arrestin domain containing 3 | 1459253_at | 0.603 | 0.000 | NM_001042591 | 13C3 |
| AU019852 |  | 1459497_at | 1.396 | 0.000 |  | 14D1 |
| Auts2 | autism susceptibility candidate 2 | 1452379_at | 1.391 | 7.326 | NM_177047 | 5G2 |
| AV264602 |  | 1457191_at | 0.757 | 7.326 |  | 3C |
| BB023775 |  | 1458525_at | 1.285 | 0.000 |  | 16C3.3 |
| BB040120 |  | 1442893_at | 0.459 | 0.000 |  | 6C3 |
| BB051515 |  | 1445307_at | 0.511 | 0.000 |  | 5G2 |
| BB113018 |  | 1444956_at | 0.773 | 8.343 |  | 5A3 |
| BB115513 |  | 1437126_at | 1.336 | 8.343 |  | 6C1 |
| BB148843 |  | 1439928_at | 1.247 | 3.283 |  | 11A3.3 |
| BB167280 |  | 1459420_at | 1.409 | 0.000 |  | 5G1 |
| BB206454 |  | 1442760_x_at | 1.410 | 1.963 |  | 11A3.3 |
| BB337886 |  | 1440807_at | 4.555 | 0.000 |  | 5A3 |
| BB341550 |  | 1443222_at | 0.829 | 3.641 |  | 1H4 |
| BB373816 |  | 1439224_at | 1.897 | 0.000 |  | 5A1 |
| BB451211 |  | 1446324_at | 2.837 | 0.000 |  | 5A2 |
| BB474913 |  | 1446713_at | 0.690 | 0.000 |  | 7F3 |
| BB523556 |  | 1440694_at | 0.770 | 7.326 |  | 4C3 |
| BB534083 |  | 1442483_at | 1.301 | 3.283 |  | 12C3 |
| BC046401 |  | 1439948_at | 1.525 | 0.000 |  | 2H3 |
| BG070910 |  | 1460151_at | 1.268 | 0.000 |  | 1A3 |
| BG075322 |  | 1444869_at | 0.700 | 0.000 |  | 12C3 |
| BG145571 |  | 1438871_at | 1.310 | 3.283 |  | 16C3.3 |
| BM117148 |  | 1459061_at | 0.794 | 7.326 |  | 5G2 |
| BM211666 |  | 1437577_at | 1.262 | 7.326 |  | 11A3.3 |
| BM238940 |  | 1445420_at | 0.737 | 8.343 |  | 13C3 |
| BM239037 |  | 1439705_at | 1.271 | 3.283 |  | 5A3 |
| Ccm1 | cerebral cavernous malformations 1 | 1428729_at | 0.725 | 0.000 | NM_030675 | 5A1 |
| Cyp51 | cytochrome P450, 51 | 1422533_at | 0.595 | 0.000 | NM_020010 | 5A1 |
| D19Ertd409e | DNA segment, Chr 19, ERATO Doi 409, expressed | 1440417_at | 0.775 | 0.000 |  | 19C3 |
| Dcx | doublecortin | 1418141_at | 0.741 | 2.043 | NM_001110222 | XF2 |
| Dcx | doublecortin | 1448974_at | 0.707 | 3.641 | NM_001110222 | XF2 |
| Dep1 | diabetic embryopathy 1 | 1438892_at | 1.292 | 3.283 |  | 17A1 |
| Dhcr24 | 24-dehydro-cholesterol reductase | 1418129_at | 1.434 | 0.000 | NM_053272 | 4C7 |
| Dzip1 | DAZ interacting protein 1 | 1443772_at | 1.797 | 3.283 | NM_025943 | 14E4 |
| Eif2s1 | eukaryotic translation initiation factor 2, subunit 1 α | 1420491_at | 1.433 | 0.000 | NM_026114 | 12C3 |
| Gm1060 | predicted gene 1060 | 1455279_at | 0.782 | 8.343 | NM_001033460 | 5B1 |
| Gnb1 | guanine nucleotide binding protein (G protein), β1 | 1425908_at | 0.512 | 0.000 | NM_001160016 | 4E2 |
| Gprc5b | G protein-coupled receptor, family C, group 5, member B | 1451411_at | 0.748 | 3.641 | NM_022420 | 7F2 |
| Gtf2ird1 | general transcription factor II I repeat domain-containing 1 | 1451899_a_at | 1.924 | 0.000 | NM_001081462 | 5G2 |
| Hoxa5 | homeo box A5 | 1448926_at | 1.306 | 7.326 | NM_010453 | 6B3 |
| Hpvc-ps | Human papillomavirus 18 E5 central sequence motif, pseudogene | 1443905_at | 0.564 | 0.000 | NM_008283 | 5G1.3 |
| Hpvc-ps | Human papillomavirus 18 E5 central sequence motif, pseudogene | 1456880_at | 1.466 | 0.000 | NM_008283 | 5G1.3 |
| Kcnh1 | potassium voltage-gated channel, subfamily H (eag-related), member 1 | 1418414_at | 0.632 | 0.000 | NM_001038607 | 1H6 |
| Kin | antigenic determinant of rec-A protein | 1427317_at | 0.753 | 7.326 | NM_025280 | 2A1 |
| Lztfl1 | leucine zipper transcription factor-like 1 | 1428974_s_at | 0.756 | 0.000 | NM_033322 | 9F4 |
| Lztfl1 | leucine zipper transcription factor-like 1 | 1435514_at | 0.522 | 0.000 | NM_033322 | 9F4 |
| Malat1 | metastasis associated lung adenocarcinoma transcript 1 (non-coding RNA) | 1436202_at | 0.797 | 7.326 | NR_002847 | 19A |
| Mapk8 | mitogen activated protein kinase 8 | 1457936_at | 0.605 | 0.000 | NM_016700 | 14B |
| Mat2a | methionine adenosyl-transferase II, α | 1423667_at | 0.758 | 0.000 | NM_145569 | 6C1 |
| MGC7817 | hypothetical protein LOC620031 | 1425424_at | 1.236 | 7.326 | XM_884414 | 6G2 |
| Mospd3 | motile sperm domain containing 3 | 1460452_at | 1.309 | 0.000 | NM_030037 | 5G2 |
| Mphosph9 | M-phase phosphoprotein 9 | 1431053_at | 0.347 | 0.000 | NM_001081323 | 5F |
| Mphosph9 | M-phase phosphoprotein 9 | 1440915_at | 0.734 | 0.000 | NM_001081323 | 5F |
| Mrpl16 | mitochondrial ribosomal protein L16 | 1450880_at | 1.421 | 0.000 | NM_025606 | 19A |
| Ndel1 | nuclear distribution gene E-like homolog 1 | 1424893_at | 1.465 | 0.000 | NM_023668 | 11B3 |
| Nisch | nischarin | 1433758_at | 1.247 | 7.326 | NM_022656 | 14B |
| Npas3 | neuronal PAS domain protein 3 | 1450287_at | 1.315 | 3.283 | NM_013780 | 12C1 |
| Nudt21 | nudix (nucleoside diphosphate linked moiety X)-type motif 21 | 1437213_at | 0.439 | 7.326 | NM_026623 | 8C5 |
| Peg3 | paternally expressed 3 | 1417355_at | 1.272 | 7.326 | NM_008817 | 7A1 |
| Pep4 | peptidase 4 | 1416712_at | 1.301 | 3.283 | NM_008820 | 7B1 |
| Pex1 | peroxisomal biogenesis factor 1 | 1440267_at | 0.573 | 0.000 | NM_027777 | 5A2 |
| Polb | polymerase (DNA directed) β | 1439840_at | 1.335 | 7.326 | NM_011130 | 8A2 |
| Ppp1cb | protein phosphatase 1, catalytic subunit, β isoform | 1431328_at | 0.609 | 0.000 | NM_172707 | 5B1 |
| Ptprf | protein tyrosine phosphatase, receptor type, F | 1420843_at | 1.300 | 8.343 | NM_011213 | 4D2.1 |
| Qk | quaking | 1429735_at | 0.782 | 7.326 | NM_001159516 | 17A1 |
| RAB3C | member RAS oncogene family | 1432415_at | 0.799 | 7.326 | NM_023852 | 13D2.2 |
| Ranbp2 | RAN binding protein 2 | 1440104_at | 0.656 | 0.000 | NM_011240 | 10B4 |
| Rgs5 | regulator of G-protein signaling 5 | 1420941_at | 0.442 | 0.000 | NM_009063 | 1H3 |
| Rtn4 | reticulon 4 | 1435284_at | 1.462 | 0.000 | NM_024226 | 11A3.3 |
| Rtn4 | reticulon 4 | 1439650_at | 1.416 | 7.326 | NM_024226 | 11A3.3 |
| Sbno | strawberry notch homolog 1 | 1426559_at | 1.262 | 7.326 | NM_001081203 | 5F |
| Setd1b | SET domain containing 1B | 1437353_at | 1.290 | 7.326 | NM_001040398 | 5F |
| Slc15a2 | solute carrier family 15 (H+/peptide transporter), member 2 | 1417600_at | 1.421 | 7.326 | NM_001145899 | 16B3 |
| Stx3 | syntaxin 3 | 1425530_a_at | 0.646 | 0.000 | NM_001025307 | 19A |
| Thrap2 | thyroid hormone receptor associated protein | 1453906_at | 0.695 | 0.000 | NM_172424 | 5F |
| Trpm3 | transient receptor potential cation channel, subfamily M, member 3 | 1456923_at | 0.703 | 0.000 | NM_001035239 | 19B |
| Zfr | Zinc finger RNA binding protein | 1442311_at | 1.301 | 0.000 | NM_011767 | 15A1 |
| Zkscan1 | zinc finger with KRAB and SCAN domains 1 | 1440771_at | 0.686 | 2.043 | NM_029869 | 5G2 |
| Zswim6 | Zinc finger, SWIM domain containing 6 | 1459722_at | 0.729 | 3.641 | NM_145456 | 13D2.1 |
